# Supplementary material for: Comparative transcriptome analysis revealing the potential mechanism of seed germination stimulated by exogenous gibberellin in Fraxinus hupehensis
Source: BMC Plant Biol. 2019 May 15;19:199. doi: 10.1186/s12870-019-1801-3 (PMC6521437; doi:10.1186/s12870-019-1801-3)
Supplement: Supplementary file 7 — Table S4. Differentially expressed TFs related to F. hupehensis seed germination. (XLSX 11 kb) [file 12870_2019_1801_MOESM7_ESM.xlsx]

## Sheet: Sheet1
	Additional file 8: Table S5. Differentially expression TFs related to seed germination in F. hupehensis.
	ID	Name	Expression									Annotation TFs family
			CK1	CK2	CK3	W1	W2	W3	G1	G2	G3
	TRINITY_DN40058_c1_g1	TGA1	7.11245	7.00581	6.93428	4.93408	4.48727	4.41176	1.7266	2.65499	1.74312	bZIP
	TRINITY_DN35422_c0_g2	WRKY22	1.08247	2.02195	2.35831	8.96214	7.14897	10.8649	69.597	34.6263	20.1607	WRKY
	TRINITY_DN43971_c1_g6	ERF25	0.33209	0.0695	0.07146	0.44346	0.21293	0.13717	3.2359	1.28163	2.65308	ERF
	TRINITY_DN31445_c0_g1	MYB44	2.17101	2.65372	1.45362	5.59778	4.35385	3.39139	8.54415	9.07644	9.87163	MYB
	TRINITY_DN32330_c2_g2	WRKY33	3.48689	3.55764	4.26729	13.0959	14.16	21.739	42.0319	32.4892	35.0635	WRKY
	TRINITY_DN38557_c2_g4	WRKY14	0.09308	0.08766	0.09013	0.27966	0.31332	0.43251	1.52463	1.27008	1.11541	WRKY
	TRINITY_DN41262_c5_g1	bHLH112	0.27149	0.5966	0.54766	0.56646	0.6963	0.69385	1.59637	3.79437	2.93711	bHLH
	TRINITY_DN35505_c0_g1	ERF3	1.22085	0.89168	0.82025	1.7218	1.2461	0.8336	2.83801	4.50012	3.43365	ERF
	TRINITY_DN35800_c3_g1	bHLH123	0.17779	0.07442	0.43994	0.63311	0.19	0.64257	2.30989	1.66636	2.89996	bHLH
	TRINITY_DN31630_c2_g2	WRKY28	0.82403	1.81671	1.66832	2.98231	4.26894	5.56961	15.0081	11.3186	19.2262	WRKY
	TRINITY_DN25402_c0_g1	MYB86	1.46653	2.36396	2.26658	2.37266	1.08501	2.17547	6.4249	5.59764	10.3082	MYB
	TRINITY_DN24260_c0_g1	bHLH137	0.06609	0.03112	0.12798	0.13238	0.19069	0.12284	0.53293	0.65584	1.35294	bHLH
	TRINITY_DN37305_c0_g2	ERF12	0	0	0.06188	0.83206	0.1844	0.29696	1.80373	2.40999	3.76537	ERF
