# Supplementary material for: Comparative transcriptome analysis revealing the potential mechanism of seed germination stimulated by exogenous gibberellin in Fraxinus hupehensis
Source: BMC Plant Biol. 2019 May 15;19:199. doi: 10.1186/s12870-019-1801-3 (PMC6521437; doi:10.1186/s12870-019-1801-3)
Supplement: Supplementary file 8 — Table S5. Primers used in qRT-PCR. (XLSX 12 kb) [file 12870_2019_1801_MOESM8_ESM.xlsx]

## Sheet: Sheet1
	Additional file 9: Table S6. Primers used in qRT-PCR.
	Gene	Primer	Forward and reverse primers 5’- 3’	Target	Annotation
	L-arabinokinase (ARA)	Sense	TGTTACTGGGCACGGATTTGG	TRINITY_DN43740_c0_g2	Amino sugar and nucleotide sugar metabolism
		Anti-sense	TCCACAATCCAATAGCACCTTCC
	6-phosphofructo-2-kinase (PFK)	Sense	TGCTGCTCAATCAGAGGTGGAC	TRINITY_DN23765_c0_g1	Glycolysis pathway
		Anti-sense	GCTCTCGCTGCCTAATACGGTT
	1,3-beta-glucan synthase (GS)	Sense	GGTCCTCCTAACCCGAACAATCA	TRINITY_DN35404_c1_g1	Sucrose metabolism
		Anti-sense	CCGTCGTAATAGCCTCCATCCTG
	transketolase (tkta)	Sense	GCAAACTCCATCAAATCATTCACA	TRINITY_DN36267_c0_g1	Biosynthesis of amino acids
		Anti-sense	GAAATACCCAACTTCTGCCATCC
	alpha-amylase (amyA)	Sense	ATCCGCCAGCAGTGTTAGCAA	TRINITY_DN36209_c0_g1	Sucrose metabolism
		Anti-sense	ATCCGCCAGCAGTGTTAGCAA
	glutathione S-transferase (GSTs)	Sense	GTAGACGCCTATCCCAACAACAC	TRINITY_DN788_c0_g1	Glutathione metabolism
		Anti-sense	TCGTCATCTGTCTTCGCTCTGTA
	E3 ubiquitin-protein ligase MARCH6 (E3)	Sense	GCACTCTCAAGTTTGCCCATCG	TRINITY_DN30265_c0_g1	Protein processing in endoplasmic reticulum
		Anti-sense	TCAGAATGATAACCACGGAGCG
	Calnexin (CANX)	Sense	GCCTTGAATGTGGTGGTGCTTAT	TRINITY_DN36951_c0_g2	Protein processing in endoplasmic reticulum
		Anti-sense	CCGATGGTGGATACTTGAGGTGG
	L-aspartate oxidase (LASPO)	Sense	TGTTATTGGCAGTGGAGTAGCAGG	TRINITY_DN40348_c0_g1	Alanine, aspartate and Glutamate metabolism
		Anti-sense	ATCTGATGGGCACAATACGGCA
	1,2-diacylglycerol 3-beta-galactosyltransferase (DGAT)	Sense	TGGCAAGGATTACAGAAGAAAGTCA	TRINITY_DN38223_c0_g1	Glycerolipid metabolism
		Anti-sense	CCTGAACAAAAGAAGGTCGGATG
	TAG lipase (TAG)	Sense	ACTGGACTCACACATCATACTCGGA	TRINITY_DN48453_c0_g1	Glycerolipid metabolism
		Anti-sense	GAGAGTATCCAGTTGGCTGAGGC
	L-ascorbate oxidase (AAO)	Sense	CTATGGCACGAACTGTCCTATCC	TRINITY_DN29938_c0_g1	Ascorbate and aldarate metabolism
		Anti-sense	AAGGAACGGGTATCACGGAAC
	superoxide dismutase (SOD)	Sense	AGGGTGTTCCCAACCTTATGAGTC	TRINITY_DN18520_c0_g1	Peroxisome
		Anti-sense	ATGCCCTGGAAGAAGAAGTGGT
	peroxiredoxin (POD)	Sense	CTTCCAGTTCACCGACGAGCA	TRINITY_DN31658_c0_g1	Peroxisome
		Anti-sense	TTGCGGGACTCAGACTCACCAT
	premnaspirodiene oxygenase (CYP71D55)	Sense	CCGCAGGATTTGATTTGGC	TRINITY_DN31658_c0_g1	Sesquiterpenoid and triterpenoid biosynthesis
		Anti-sense	TATTATGTCCTCGCTGCCCAA
	zeatin O-glucosyltransferase (ZOG)	Sense	GTGGTGGTTGTAATGGTGCCTC	TRINITY_DN36207_c0_g2	Zeatin biosynthesis
		Anti-sense	TAGTGGACGGGGATGTTGTAGG
	adenylate isopentenyltransferase (IPT)	Sense	GGCTTCTATTGCCACGAACTCTA	TRINITY_DN29565_c0_g1	Zeatin biosynthesis
		Anti-sense	GACAAAGATGAGTTCAACACGGG
	gibberellin receptor GID1 (GID1)	Sense	GCCCCAGAAAACAAAGTTCAATG	TRINITY_DN34026_c1_g1	GA3 signal transduction
		Anti-sense	ATTCACGGATACTACGGCAGCAT
	auxin-responsive protein IAA (IAA)	Sense	TGAATGCCCATCGCTGCTA	TRINITY_DN37060_c5_g2	IAA signal transduction
		Anti-sense	CAACGAGCATCCAGTCTCCTTC
	protein phosphatase 2C (PP2C)	Sense	GTGCCACTATGGGGTTCAGTTTCTA	TRINITY_DN35349_c5_g6	ABA signal transduction
		Anti-sense	GTCTGACCTATCCCACCCATTACAC
	abscisic acid receptor PYR/PYL family (PYR/PYL)	Sense	CCACCACCACTATTTATGAGGATGA	TRINITY_DN28186_c0_g1	ABA signal transduction
		Anti-sense	TTACACCCTATTATCGTATCGGCAA
	Enhancer of mRNA-decapping protein (Edcp)	Sense	TCGTGTGCTTAGTGGGCATTGA	TRINITY_DN10074_c0_g1_i1	RNA degradation
		Anti-sense	GAAAGAAATGGTCAAGCCCAGAAG
	CCR4-NOT transcription complex subunit 7/8 (CNOT7/8)	Sense	ATTCTTCAATGAGGACGGCGA	TRINITY_DN18805_c0_g1_i1	RNA degradation
		Anti-sense	ACAAGGGAAAGGAGTATTCGCTG
	U6 snRNA-associated Sm-like protein LSm3 (LSM3)	Sense	CAATCTGGTGTTAGGAGAGGTGGAA	TRINITY_DN31221_c0_g3_i1	RNA degradation
		Anti-sense	AAGGACAACACTATCGCCTCTCACA
	18S rRNA (18S)	Sense	GATGGTGTGCCCAGATTATTGC	TRINITY_DN35717_c0_g1	Reference gene
		Anti-sense	GAAGACCTAAGCCCTGACCCAT
